# Supplementary material
Source: PubMed Central journal article supplement (PMC3422622)
Supplement: NIHMS394884-supplement-01.pdf [file NIHMS394884-supplement-01.pdf]

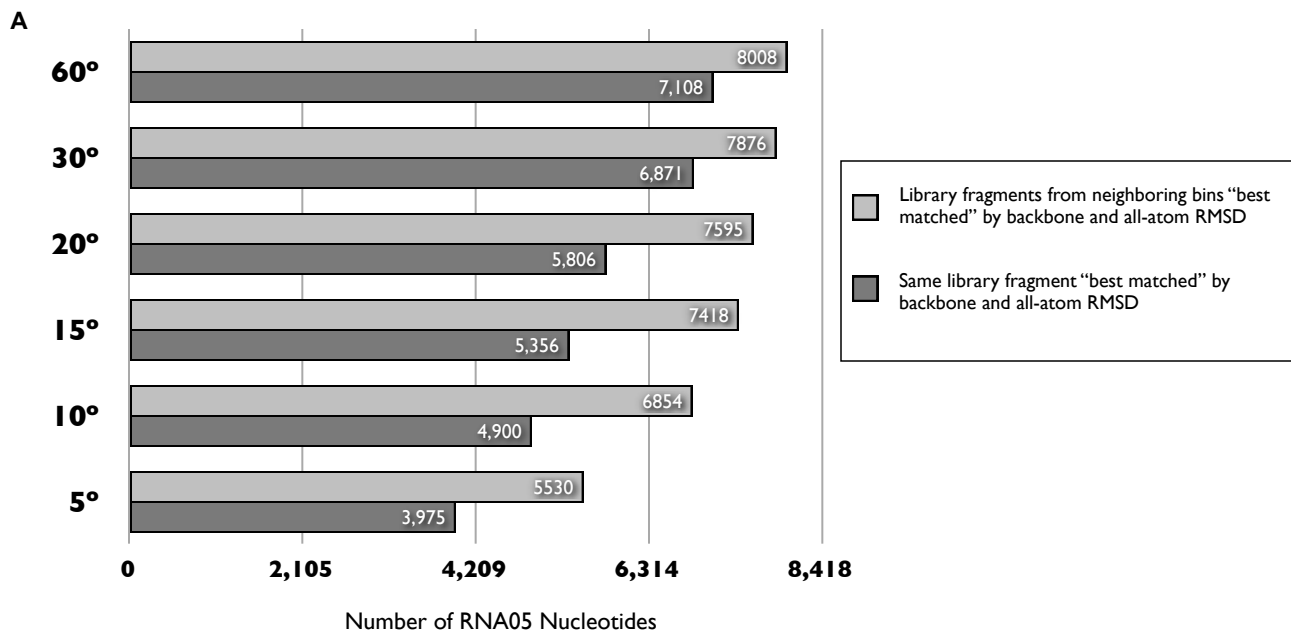

**Supplementary Figure 2:** For ~8,500 RNA05 nucleotides, we searched each library and determined which fragment best matched by backbone RMSD alone. We then searched each library a second time, looking for which fragment best matched the entire nucleotide, including both backbone and base, by all-atom RMSD. The number of times the same library fragment was selected to represent the backbone and all-atom coordinates of an RNA05 nucleotide is shown in dark grey bars. The light grey bars depict cases where the two fragments selected to represent the backbone and all-atom coordinates of an RNA05 nucleotide were from neighboring pseudo-torsional bins.
